# Supplementary material for: The terminator "toy" chemistry test: a simple tool to assess errors in transport schemes
Source: Copernicus journal article supplement (doi:10.5194/gmd-8-1299-2015), 2015-05-04
Supplement: Supplementary file 1 [file gmd-8-1299-2015-supplement.zip]

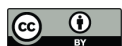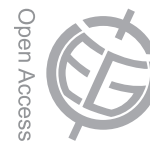

## *Supplement of*

# **The terminator “toy” chemistry test: a simple tool to assess errors in transport schemes**

**P. H. Lauritzen et al.**

*Correspondence to:* P. H. Lauritzen (pel@ucar.edu)

- [gmd-8-1299-2015-supplement-cover-letter.pdf](#)
- [FV.gif](#)
- [README](#)
- [SE.gif](#)
- [chemistry.F90](#)
- [example\\_plotting\\_routine\\_xt.ncl](#)
- [xtn.nc](#)
